# Supplementary material
Source: PubMed Central journal article supplement (PMC7409739)
Supplement: CJN.16011219SupplementaryData.pdf [file CJN.16011219SupplementaryData.pdf]

## **Supplemental Material Table of Contents**

Supplemental Item 1. Full Inclusion and Exclusion Criteria

Supplemental Table 1. Dose Adjustment Algorithm (Daprodustat)

Supplemental Table 2. Dose Adjustment Algorithm (Darbepoetin Alfa)

Supplemental Table 3. Number (%) of Participants with a Hemoglobin Increase of >2.0 g/dL over Any 4 Weeks (ITT Population)

Supplemental Table 4. Number (%) of Participants with a Hemoglobin Level >13.0 g/dL and Number of Episodes (ITT Population)

Supplemental Table 5. Adverse Events of Special Interest (Safety Population)

Supplemental Table 6. Systolic and Diastolic Blood Pressure at Week 52 (Safety Population)

Supplemental Table 7. Change from Baseline in Potassium (mmol/L) (Safety Population)

Supplemental Table 8. Potassium Results: Post-Baseline Relative to Baseline (Safety Population)

Supplemental Table 9. Institutional Review Board

## Supplemental Item 1. Full Inclusion and Exclusion Criteria

**Inclusion Criteria:** A participant was eligible for inclusion in this study only if all of the following criteria applied at screening and day 1 (unless otherwise specified):

- Age (at informed consent):  $\geq 20$  years of age
- On hemodialysis or hemodiafiltration given 3 times weekly for at least 12 weeks before screening
- Use of the same ESA for at least 10 weeks before screening
  - ESA dose: Darbepoetin alfa 10 to 60  $\mu\text{g}$  per week, epoetin (including biosimilars)  $\leq 9000$  IU per week, or epoetin beta pegol up to 250  $\mu\text{g}$  per 4 weeks. Note: ESA dose must have been greater than the minimum ESA dose if hemoglobin  $>12.0$  g/dL to 12.5 g/dL (minimum ESA dose: epoetins [including biosimilars], 1500 U per week; darbepoetin alfa, 10  $\mu\text{g}$  per week; and epoetin beta pegol, 25  $\mu\text{g}$  every 4 weeks)
- Hemoglobin:  $\geq 9.5$  g/dL and  $\leq 12.5$  g/dL, determined by a hemoglobin analyzer (HemoCue) at the site
- Ferritin  $>100$  ng/mL or TSAT  $>20\%$  (screening verification only)
- Not pregnant, having no childbearing potential, and not breastfeeding
- Females of childbearing potential had to agree to comply with one of the contraception methods from 28 days prior to the first dose of study drug

until the completion of the follow-up visit

- Written informed consent, including adherence to the requirements and conditions specified in the consent form and the protocol, must have been obtained from each participant as specified in the protocol, Section 10.2

**Exclusion Criteria:** A participant was not eligible for inclusion in this study if any of the following criteria applied at screening or day 1 unless otherwise specified:

CKD-related criteria

- Planned living-related kidney transplant during the study

Anemia-related criteria

- History of bone marrow hypoplasia or pure red cell aplasia
- Other causes of anemia including pernicious anemia, thalassemia, sickle cell anemia, or myelodysplastic syndromes
- Evidence of actively bleeding gastric, duodenal, or esophageal ulcer or clinically significant gastrointestinal bleeding within 10 weeks before screening or during a period from screening to day 1

Cardiovascular disease-related criteria

- Myocardial infarction, acute coronary syndrome, stroke, or transient ischemic attack: Diagnosed within 10 weeks before screening or during a period from screening to day 1
- Chronic Class IV heart failure, as defined by the New York Heart

Association (NYHA) functional classification system

- Corrected QT (QTc) interval (screening verification only): QTc >500 msec; or QTc >530 msec in patients with bundle branch block. QT interval corrected using the Bazett formula (QTcB) was used, and ECG could be mechanically or manually read

#### Other disease-related criteria

- Liver disease (if any of the following occurred):
  - Alanine aminotransferase (ALT) >2×upper limit of normal (ULN) (screening verification only)
  - Bilirubin >1.5×ULN (isolated bilirubin >1.5×ULN was acceptable if bilirubin was fractionated and direct bilirubin was <35%) (screening verification only)
  - Current unstable active liver or biliary disease (generally defined by the onset of ascites, encephalopathy, coagulopathy, hypoalbuminemia, esophageal/gastric varices, persistent jaundice, or cirrhosis)

Note: Stable liver disease (including asymptomatic gallstones, chronic hepatitis B/C, or Gilbert's syndrome) was acceptable if the patient otherwise met entry criteria

- History of malignancy within 2 years before screening, currently receiving treatment for cancer, or complex kidney cyst >3 cm (II F, III, or IV based on the Bosniak classification)

Note: The only exception was localized squamous cell or basal cell carcinoma of the skin that had been definitively treated  $\geq 10$  weeks before screening

#### Concomitant medication and other study treatment-related criteria

- Planned use of IV iron during the screening phase or during a period from day 1 to week 4. Note: Oral iron was acceptable. However, the same dose regimen must have been used throughout the screening phase and from day 1 to week 4. Antihyperphosphatemic agents containing iron (eg, ferric citrate hydrate) were also acceptable only if used for at least 12 weeks before screening. However, they must have been continued throughout the screening phase and from day 1 to week 4
- History of severe allergic or anaphylactic reactions or hypersensitivity to excipients in the investigational product (see the daprodustat investigator's brochure [IB] or the prescribing information for darbepoetin alfa)
- Use or planned use of any prescription or nonprescription drugs or dietary supplements that was prohibited during the study period (prohibited medications: strong inducers and inhibitors of cytochrome P450 [CYP] 2C8)
- Use of an investigational agent within 30 days or 5 half lives of the investigational agent (whichever was longer)
- Any prior treatment with daprodustat for a treatment duration of  $>30$  days
- Any other condition, clinical or laboratory abnormality, or examination

finding considered by the investigator (or sub-investigator) would put the patient at unacceptable risk and could affect study compliance or prevent understanding of the aims or investigational procedures or possible consequences of the study

**Withdrawal Criteria:**

Participants were withdrawn from the study if their hemoglobin levels fell below 7.5 g/dL (based on the average of 2 HemoCue hemoglobin values of the same sample). Other withdrawal criteria included kidney transplant, pregnancy, new or recurrent cancer, liver chemistry abnormalities exceeding threshold criteria, and the need for chronic use of prohibited medication (ie, CYP2C8 inhibitors/inducers).

**Supplemental Table 1. Dose Adjustment Algorithm (Daprodustat)**

| <b>Hemoglobin (g/dL)</b> | <b>Hemoglobin increase over 4 weeks (g/dL)</b> | <b>Treatment</b>                                                                                                                                                                                                                                                                 |
|--------------------------|------------------------------------------------|----------------------------------------------------------------------------------------------------------------------------------------------------------------------------------------------------------------------------------------------------------------------------------|
| >13.0                    | NA                                             | Interrupt treatment (and administer placebo) until hemoglobin decreases to less than 12.0 g/dL, and resume treatment at the one lower dose level (If interrupted [and placebo administered] at 1 mg, resume treatment at 1 mg after the one-step dose increase criterion is met) |
| ≥12.0 and ≤13.0          | NA                                             | One-step dose reduction                                                                                                                                                                                                                                                          |
| ≥10.0 and <12.0          | >2.0                                           | One-step dose reduction                                                                                                                                                                                                                                                          |
|                          | ≤2.0                                           | Continue treatment at the current dose level                                                                                                                                                                                                                                     |
| ≥7.5 and <10.0           | >2.0                                           | One-step dose reduction                                                                                                                                                                                                                                                          |
|                          | 0.5–2.0                                        | Continue treatment at the current dose level                                                                                                                                                                                                                                     |
|                          | <0.5                                           | One-step dose increase                                                                                                                                                                                                                                                           |
| <7.5                     | NA                                             | Discontinue treatment permanently <sup>a</sup> and initiate another appropriate treatment                                                                                                                                                                                        |

<sup>a</sup>If an initial hemoglobin value was < 7.5 g/dL, measurement was repeated at the same study visit (using the same sample) to calculate the average. If the average met the hemoglobin stopping criteria, study treatment was required to be permanently discontinued.

**Supplemental Table 2. Dose Adjustment Algorithm (Darbepoetin Alfa)**

| <b>Hemoglobin (g/dL)</b> | <b>Treatment</b>                                                                                                                                                                                                                                                            |
|--------------------------|-----------------------------------------------------------------------------------------------------------------------------------------------------------------------------------------------------------------------------------------------------------------------------|
| >13.0                    | Interrupt treatment (and administer placebo) until Hgb decreases to less than 12.0 g/dL, and resume treatment at the one lower dose level (If interrupted [and placebo administered] at 10 µg, resume treatment at 10 µg after the one-step dose increase criterion is met) |
| ≥12.0 and ≤13.0          | One-step dose reduction                                                                                                                                                                                                                                                     |
| ≥10.0 and <12.0          | Continue treatment at the current dose level <sup>a</sup>                                                                                                                                                                                                                   |
| ≥7.5 and <10.0           | One-step dose increase <sup>b</sup>                                                                                                                                                                                                                                         |
| <7.5                     | Discontinue treatment permanently <sup>c</sup> and initiate another appropriate treatment                                                                                                                                                                                   |

<sup>a</sup>If hemoglobin >1 g/dL increase over 2 weeks, the dose was reduced to the one-step lower dose level.

<sup>b</sup>If hemoglobin >1 g/dL increase over 2 weeks, treatment was continued at the same dose level. If there was a safety concern, however, the dose reduction was allowed at the investigator's (or sub-investigator's) discretion to the one-step lower dose level.

<sup>c</sup>If an initial hemoglobin value was <7.5 g/dL, measurement was repeated at the same study visit (using the same sample) to calculate the average. If the average met the hemoglobin stopping criteria, study treatment was required to be permanently discontinued.



**Supplemental Table 3. Number (%) of Participants with a Hemoglobin Increase of >2.0 g/dL over Any 4 Weeks (ITT Population)**

|                               | <b>Daprodustat<br/>(N = 133)</b> | <b>Darbepoetin alfa<br/>(N = 134)</b> |
|-------------------------------|----------------------------------|---------------------------------------|
| Number of participants, n (%) | 1 (<1)                           | 2 (1)                                 |

CI, confidence interval; ITT, intent-to-treat.

**Supplemental Table 4. Number (%) of Participants with a Hemoglobin Level >13.0 g/dL and Number of Episodes (ITT Population)**

|                               | <b>Daprodustat<br/>(N = 133)</b> | <b>Darbepoetin alfa<br/>(N = 134)</b> |
|-------------------------------|----------------------------------|---------------------------------------|
| Number of participants, n (%) | 7 (5)                            | 8 (6)                                 |
| Number of episodes            | 9                                | 12                                    |

Includes hemoglobin values measured during both scheduled and unscheduled visits.  
ITT, intent-to-treat.

**Supplemental Table 5 Adverse Events of Special Interest (Safety Population)**

| <b>AE, n (%)</b>                                                                                                 | <b>Daprodustat<br/>(N = 136)</b> | <b>Darbepoetin Alfa<br/>(N = 135)</b> |
|------------------------------------------------------------------------------------------------------------------|----------------------------------|---------------------------------------|
| <b>Death, myocardial infarction, stroke, heart failure, thromboembolic events, thrombosis of vascular access</b> | <b>9 (7)</b>                     | <b>10 (7)</b>                         |
| Arteriosclerosis coronary artery                                                                                 | 0                                | 1 (<1)                                |
| Cardiac failure <sup>a</sup>                                                                                     | 1 (<1)                           | 2 (1)                                 |
| Cerebral infarction                                                                                              | 1 (<1)                           | 1 (<1)                                |
| Pulmonary edema                                                                                                  | 0                                | 1 (<1)                                |
| Retinal vein occlusion                                                                                           | 2 (1)                            | 1 (<1)                                |
| Retinal artery occlusion                                                                                         | 0                                | 1 (<1)                                |
| Shunt events <sup>b</sup>                                                                                        | 4 (3)                            | 4 (3)                                 |
| Venous occlusion                                                                                                 | 1 (<1)                           | 0                                     |
| <b>Esophageal and gastric erosions</b>                                                                           | <b>3 (2)</b>                     | <b>5 (4)</b>                          |
| Gastritis erosive                                                                                                | 2 (1)                            | 2 (1)                                 |
| Chronic gastritis                                                                                                | 0                                | 1 (<1)                                |
| Duodenal perforation                                                                                             | 1 (<1)                           | 0                                     |
| Gastric ulcer                                                                                                    | 0                                | 1 (<1)                                |
| Hemorrhagic erosive gastritis                                                                                    | 0                                | 1 (<1)                                |
| <b>Proliferative retinopathy, macular edema, choroidal neovascularization</b>                                    | <b>4 (3)</b>                     | <b>4 (3)</b>                          |
| Macular edema                                                                                                    | 2 (1)                            | 2 (1)                                 |
| Anterior chamber angle neovascularization                                                                        | 2 (1)                            | 1 (<1)                                |
| Retinal hemorrhage                                                                                               | 0                                | 1 (<1)                                |
| <b>Cardiomyopathy</b>                                                                                            | <b>0</b>                         | <b>1 (&lt;1)</b>                      |
| Hypertensive cardiomyopathy                                                                                      | 0                                | 1 (<1)                                |
| <b>Pulmonary artery hypertension</b>                                                                             | <b>1 (&lt;1)</b>                 | <b>0</b>                              |
| Pulmonary hypertension                                                                                           | 1 (<1)                           | 0                                     |
| <b>Cancer-related mortality and tumor progression and recurrence</b>                                             | <b>0</b>                         | <b>1 (&lt;1)</b>                      |

|                                                                                    |          |                  |
|------------------------------------------------------------------------------------|----------|------------------|
| Pancreatic carcinoma                                                               | 0        | 1 (<1)           |
| <b>Exacerbation of rheumatoid arthritis</b>                                        | <b>0</b> | <b>1 (&lt;1)</b> |
| Rheumatoid arthritis                                                               | 0        | 1 (<1)           |
| <b>Thrombosis and/or tissue ischemia<br/>secondary to excessive erythropoiesis</b> | <b>0</b> | <b>0</b>         |

---

<sup>a</sup>Cardiac failure and cardiac failure congestive.

<sup>b</sup>Shunt malfunction, shunt occlusion, shunt stenosis, shunt thrombosis.

AE, adverse event

**Supplemental Table 6. Systolic and Diastolic Blood Pressure at Week 52 (Safety Population)**

|                                                           | <b>Daprodustat (N = 136)</b> | <b>Darbepoetin Alfa (N = 135)</b> |
|-----------------------------------------------------------|------------------------------|-----------------------------------|
|                                                           | <b>Post Dialysis</b>         | <b>Post Dialysis</b>              |
| <b>Systolic blood pressure (mmHg)</b>                     |                              |                                   |
| <b>Baseline, n</b>                                        | <b>136</b>                   | <b>135</b>                        |
| Mean ± SD                                                 | 139 (23)                     | 137 (23)                          |
| <b>Change from baseline at week 52, n</b>                 | <b>115</b>                   | <b>119</b>                        |
| Mean ± SD                                                 | -1 (24)                      | 2 (27)                            |
| <b>Diastolic blood pressure (mmHg)</b>                    |                              |                                   |
| <b>Baseline, n</b>                                        | <b>136</b>                   | <b>135</b>                        |
| Mean ± SD                                                 | 78 (14)                      | 78 (13)                           |
| <b>Change from baseline at week 52, n</b>                 | <b>115</b>                   | <b>119</b>                        |
| Mean ± SD                                                 | -1 (13)                      | 1 (15)                            |
| <b>HTN medications changed due to increased BP, n (%)</b> | <b>51 (38)</b>               | <b>66 (49)</b>                    |

BP, blood pressure; HTN, hypertension; SD, standard deviation.

**Supplemental Table 7. Change from Baseline in Potassium (mmol/L)  
(Safety Population)**

|                                        | <b>Daprodustat<br/>(N = 136)</b> | <b>Darbepoetin alfa<br/>(N = 135)</b> |
|----------------------------------------|----------------------------------|---------------------------------------|
| <b>Baseline</b>                        |                                  |                                       |
| n                                      | 136                              | 135                                   |
| Mean (SD)                              | 5.0 (0.8)                        | 5.0 (0.7)                             |
| <b>Change from Baseline at Week 4</b>  |                                  |                                       |
| n                                      | 133                              | 134                                   |
| Mean (SD)                              | 0.0 (0.5)                        | 0.0 (0.5)                             |
| <b>Change from Baseline at Week 16</b> |                                  |                                       |
| n                                      | 123                              | 129                                   |
| Mean (SD)                              | -0.1 (0.5)                       | -0.1 (0.6)                            |
| <b>Change from Baseline at Week 28</b> |                                  |                                       |
| n                                      | 122                              | 126                                   |
| Mean (SD)                              | -0.1 (0.6)                       | -0.1 (0.6)                            |
| <b>Change from Baseline at Week 40</b> |                                  |                                       |
| n                                      | 120                              | 125                                   |
| Mean (SD)                              | -0.1 (0.6)                       | -0.1 (0.6)                            |
| <b>Change from Baseline at Week 52</b> |                                  |                                       |
| n                                      | 115                              | 120                                   |
| Mean (SD)                              | -0.1 (0.6)                       | -0.1 (0.6)                            |

Note: Baseline value is derived from the latest pre-dose assessment.  
SD, Standard deviation.

**Supplemental Table 8. Potassium Results: Post-Baseline Relative to Baseline (Safety Population)**

| <b>Change Category (lower/upper boundary of clinical concern)</b> | <b>Daprodustat (N = 136)</b> | <b>Darbepoetin Alfa (N = 135)</b> |
|-------------------------------------------------------------------|------------------------------|-----------------------------------|
| n                                                                 | 136                          | 134                               |
| Low (>0.5 mmol/L below LLRR), n (%)                               | 1 (<1)                       | 0                                 |
| Within range or no change, n (%)                                  | 120 (88)                     | 109 (81)                          |
| High (>1.0 mmol/L above ULRR), n (%)                              | 15 (11)                      | 25 (19)                           |

Note: Participants are counted in the category that their value changes to (low, within range or no change, or high), unless there is no change in their category. Participants whose lab value category was unchanged (eg, high to high), or whose value became within range, are recorded in the "To within range or no change" category. Participants are counted twice if they had values that changed "To low" and "To high", so the percentages may not add to 100%. Participants with a missing baseline value are assumed to have a within range value. ULRR, Upper limit of normal range; LLRR, Lower limit reference range.

**Supplemental Table 9. Institutional Review Board**

| Institutional Review Board List                          |                                                                                                                               |
|----------------------------------------------------------|-------------------------------------------------------------------------------------------------------------------------------|
| Institution Name                                         | Name of IEC/IRB                                                                                                               |
| Kasugai Municipal Hospital                               | Kasugai Municipal Hospital, Institutional Review Board<br>1-1-1, Takaki-cho, Kasugai-city, Aichi, 486-8510, Japan             |
| Fukui-ken Saiseikai Hospital                             | Fukui-ken Saiseikai Hospital, Institutional Review Board<br>7-1, Funabashi, Wadanaka-cho, Fukui-city                          |
| Higashinaebo Hospital                                    | Higashinaebo Hospital, Institutional Review Board                                                                             |
| Japanese Red Cross Society Azumi Hospital                | Japanese Red Cross Society Azumi Hospital, Institutional<br>Review Board<br>5685, Toyoshina, Azumino-city, Nagano-ken         |
| Kasaoka Daiichi Hospital                                 | Jinbo Orthopedic Clinic, Institutional Review Board                                                                           |
| Miyaji Clinic                                            |                                                                                                                               |
| Hasegawa Hospital                                        |                                                                                                                               |
| Kasugai Municipal Hospital                               | Kasugai Municipal Hospital, Institutional Review Board<br>1-1-1, Takaki-cho, Kasugai-city, Aichi, 486-8510, Japan             |
| Kurobe City Hospital                                     | Kurobe City Hospital, Institutional Review Board<br>1108-1, Mikkaichi, Kurobe-city, Toyama, 938-8502, Japan                   |
| Anjou Kyoritsu Clinic                                    | Nagoya Kyoritsu Hospital, Institutional Review Board<br>1-172 Hokke, Nakagawa-ku, Nagoya-shi                                  |
| Meiko Kyoritsu Clinic                                    |                                                                                                                               |
| Kaikoukai Central Clinic                                 |                                                                                                                               |
| Medical Corporation Kaikoukai Hekikai Kyoritsu<br>Clinic |                                                                                                                               |
| Medical Corporation Jiyoukai Akagaki Clinic              | Nihonbashi Sakura Clinic, Institutional Review Board<br>1-9-2 Nihonbashi Kayaba-cho,<br>Chuo-ku, Tokyo, 103-0025, Japan       |
| Kano Hospital Medical Corporation Houshikai              |                                                                                                                               |
| Fukuoka Wajiro Hospital                                  |                                                                                                                               |
| Takayama Hospital                                        |                                                                                                                               |
| Meiyo Clinic                                             | Review Board of Human Rights and Ethics for Clinical<br>Studies Ethics Review Committee<br>13-2 Ichibancho, Chiyoda-ku, Tokyo |
| Matsumoto City Hospital                                  |                                                                                                                               |
| Kanno Dialysis & Vascular Access Clinic                  |                                                                                                                               |
| Kohitsujikai Group Naganuma Clinic                       |                                                                                                                               |
| Yokohama Jin Clinic                                      |                                                                                                                               |
| Suda Clinic                                              |                                                                                                                               |
| Kamiida Clinic                                           |                                                                                                                               |
| Kyoto Okamoto Memorial Hospital                          |                                                                                                                               |
| Ora Hospital                                             |                                                                                                                               |
| Kusunoki Hospital                                        |                                                                                                                               |
| Isesaki Municipal Hospital                               |                                                                                                                               |
| Social medical corporation Seichokai Fuchu<br>Hospital   |                                                                                                                               |
| Nozaki Clinic                                            |                                                                                                                               |
| Oda Clinic                                               |                                                                                                                               |



|                                                                                                                                          |                                                                                                               |
|------------------------------------------------------------------------------------------------------------------------------------------|---------------------------------------------------------------------------------------------------------------|
| Kuwajima Clinic                                                                                                                          | Sugiura Clinic, Institutional Review Board<br>Rm301, 4-4-16, Honcho, Kawaguchi-shi, Saitama                   |
| Jusendo Clinic                                                                                                                           |                                                                                                               |
| Tsuchiura Beryl Clinic                                                                                                                   |                                                                                                               |
| Medical Corporation Hakuyukai Kikuchi Internal<br>Medicine Clinic                                                                        |                                                                                                               |
| Kinashi Obayashi Hospital                                                                                                                |                                                                                                               |
| Tenjin Clinic                                                                                                                            |                                                                                                               |
| Futakotamagawaeki mae Clinic                                                                                                             |                                                                                                               |
| St. Hill Hospital                                                                                                                        |                                                                                                               |
| Kawadairanaika Medical Clinic                                                                                                            |                                                                                                               |
| Houshinkai Yokodai Central Clinic                                                                                                        |                                                                                                               |
| Houshinkai Yokohama Minami Clinic                                                                                                        |                                                                                                               |
| Tachibanadai Hospital                                                                                                                    |                                                                                                               |
| Tokiwa Clinic                                                                                                                            |                                                                                                               |
| Suzuki Clinic                                                                                                                            |                                                                                                               |
| Sunagawa City Medical Center                                                                                                             | Sunagawa City Medical Center, Institutional Review Board<br>3-1-1, Nishi4-jo Kita, Sunagawa-city              |
| Hosaka Clinic                                                                                                                            | Supporo Dermatology Clinic, Institutional Review Board<br>Minami 3 Jo Nishi 2 Chome 1-1, Chuo-ku, Sapporo-shi |
| Takikawa Municipal Hospital                                                                                                              | Takikawa Municipal Hospital, Institutional Review Board<br>2-2-34, Omachi, Takikawa-city                      |
| Social Welfare Organization Saiseikai Imperial<br>Gift Foundation, Inc. Osaka prefecture branch of<br>Saiseikai Tondabayashi<br>Hospital | Tokai Memorial Hospital, Institutional Review Board<br>681-47 Ohhora Hazama-cho, Kasugai-shi, Aichi-ken       |
| Yamagata Tokushukai Hospital                                                                                                             | Tokushukai Group, Institutional Review Board<br>1-8-7, Koji-machi, Chiyoda-ku, Tokyo 102-0083, Japan          |
| Hanyu General Hospital                                                                                                                   |                                                                                                               |
